# Supplementary material
Source: HighWire-hosted journal article supplement (doi:10.1101/rna.074625.120)
Supplement: Supplemental_Information.pdf [file Supplemental_Information.pdf]

## SUPPLEMENTARY INFORMATION

### **The RNA transport factor PHAX is required for proper histone H2AX expression and DNA damage response.**

Mitsuhiro Machitani, Ichiro Taniguchi, Asako McCloskey, Tatsuya Suzuki, Mutsuhito Ohno

#### **Supplementary Materials and Methods**

##### ***Plasmids***

Human PA28 $\gamma$  cDNA was synthesized by Eurofins Genomics (Tokyo, Japan) and cloned into pcDNA3 (Thermo Fisher Scientific, Waltham, MA), resulting in pcDNA3-PA28 $\gamma$ .

##### ***Cell cycle analysis***

Cells were fixed with 70% ethanol, stained with FxCycle PI/RNase Staining Solution (Thermo Fisher Scientific), and analyzed by flow cytometry. Data was analyzed by FlowJo software (Tree Star, San Carlos, CA).

To synchronize the cell cycle, cells were cultured in thymidine-containing medium at 2.5 mM for 18 hrs, and then the medium was changed to normal medium. After 9-hr incubation, the cells were re-cultured in thymidine-containing medium at 2.5 mM for 16 hrs. The synchronization of cell cycle was confirmed by flow cytometry, as described above.

##### ***Northern blotting analysis***

Northern blotting analysis was performed as previously described (Machitani et al. 2017). Total RNA was extracted from the cells with Sepasol-RNA I Super (Nacalai Tesque, Kyoto, Japan). Ten micrograms of total RNA per lane was loaded onto 15% polyacrylamide denaturing gel. After electrophoresis, bands of RNA were transferred to Hybond-N+ membranes (Roche, Mannheim, Germany). The membranes were then probed with <sup>32</sup>P-labeled synthetic oligonucleotides that were complementary to the sequence of human U1 snRNA, U7 snRNA, or 5.8S ribosomal RNA (U1: 5'-TTATGCAGTCGAGTTTCCCACATTT-3'; U7: 5'-CAGATTCCTGGTGAAAACCTGG-3'; 5.8S: 5'-TCGAAGTGTCGATGATCAATGTGTC-3').

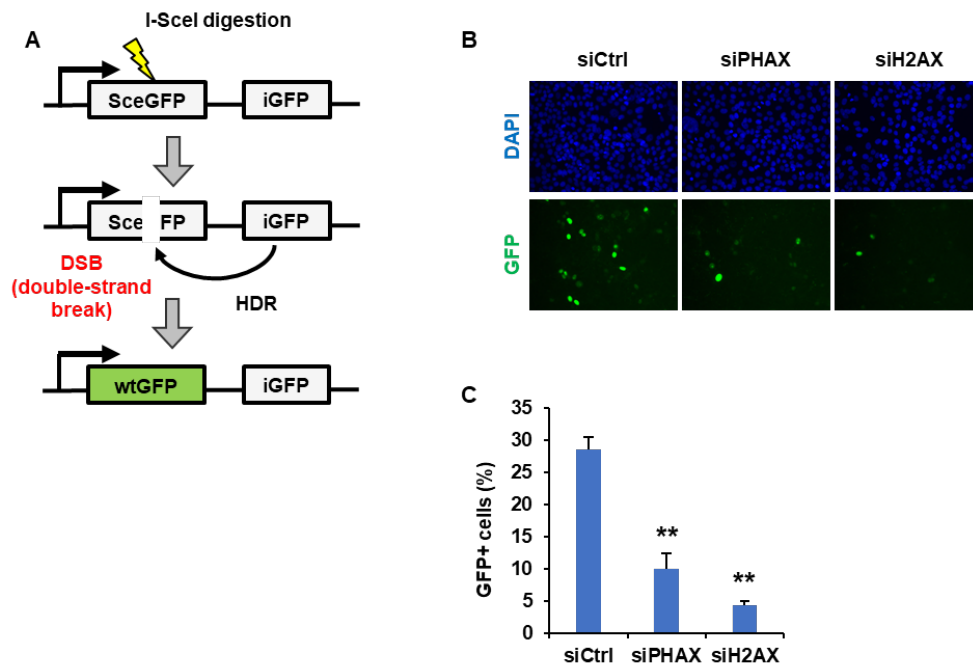

**Fig. S1. Inhibition of DNA repair by knockdown of PHAX (related to Fig. 1).**

(A) Reconstitution of the GFP gene by a homology-dependent repair (HDR). I-SceI-mediated production of double-strand DNA breaks (DSBs) induces HDR, resulting in GFP expression. (B,C) U2OS cells were co-transfected with the indicated siRNAs and the reporter plasmid (pDRGFP) for DNA repair assay. Fluorescence microscopic images were obtained, and the numbers of GFP-positive cells were counted. Data are the means  $\pm$  S.D. (n=4). \*\* $P < 0.001$ .

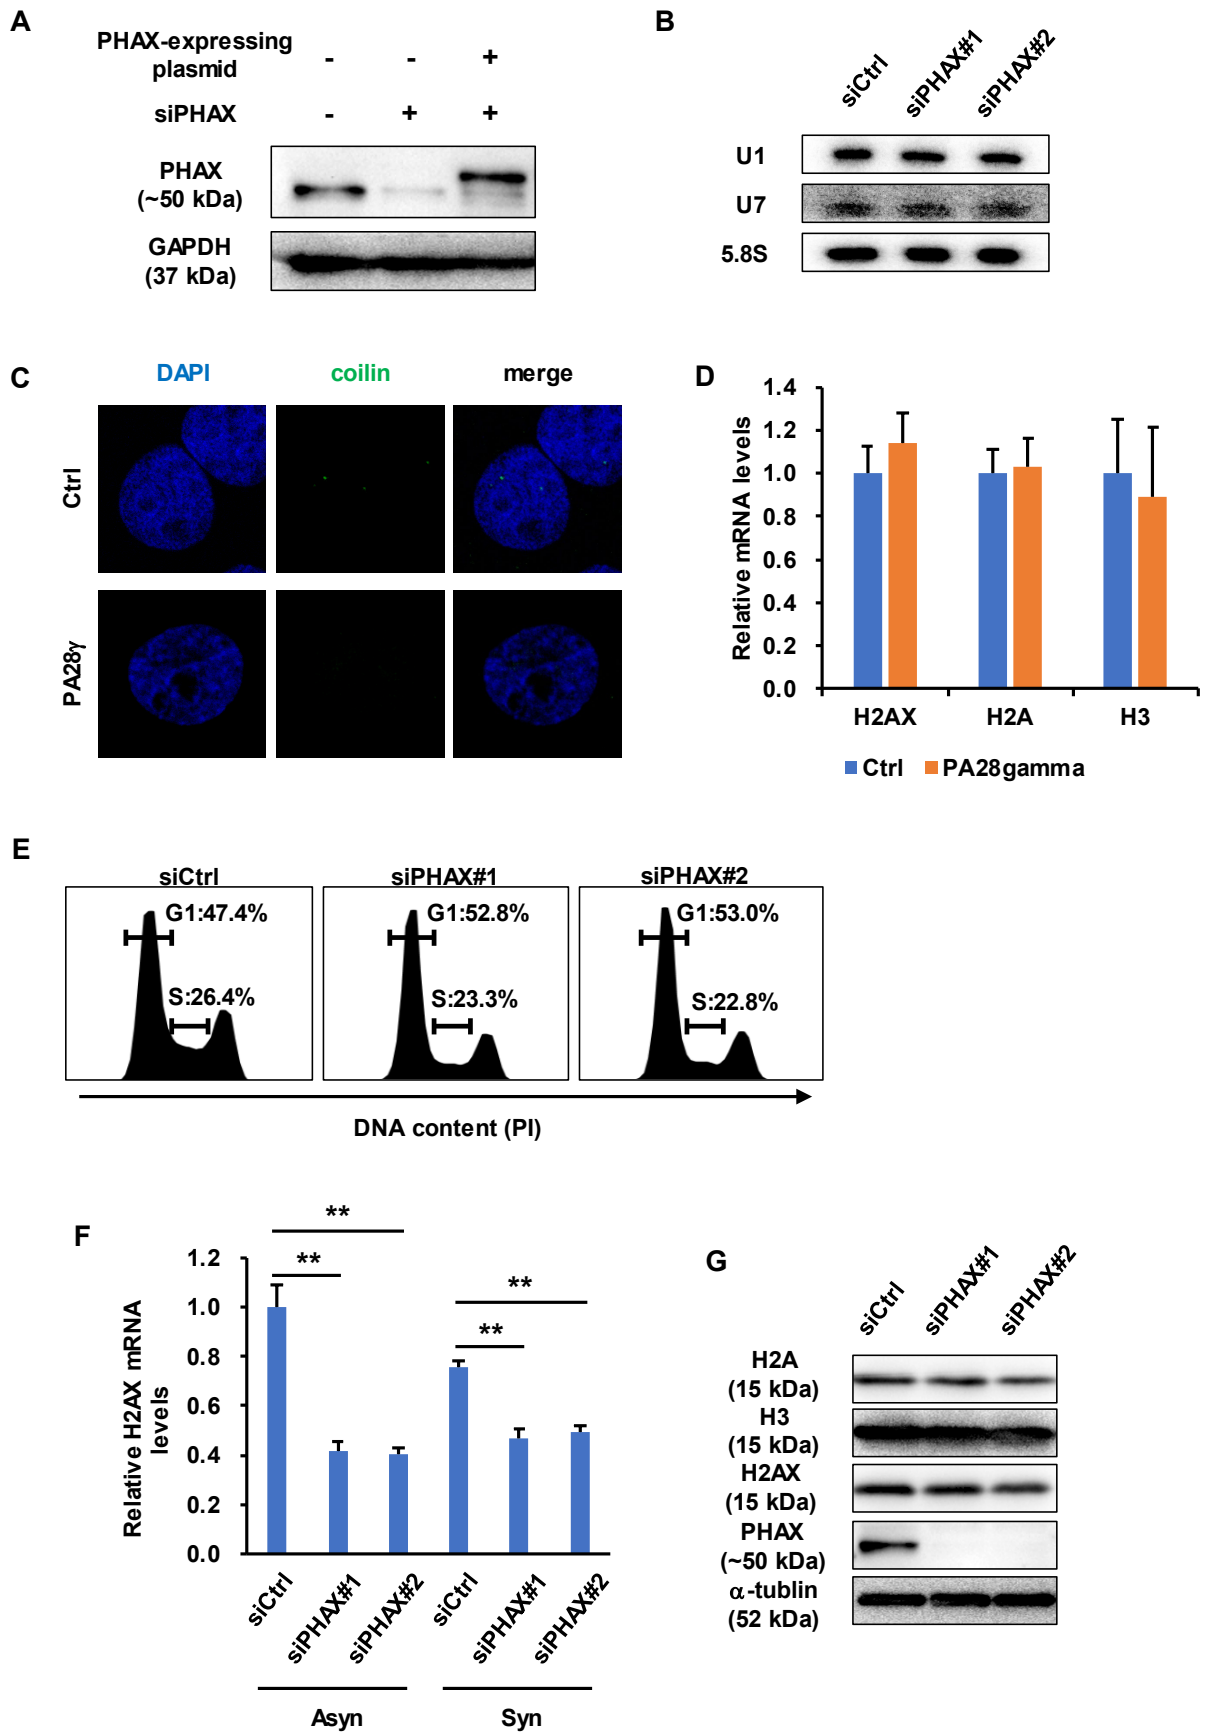

**Fig. S2. Suppression of H2AX expression by knockdown of PHAX (related to Figs. 2 and 3).**

**(A)** U2OS cells were co-transfected with siPHAX and a PHAX-expressing plasmid. After 48-hr incubation, PHAX protein levels were determined by western blotting analysis. **(B)** U2OS cells were transfected with the indicated siRNAs. After 48-hr incubation, the indicated RNA levels were determined by northern blotting analysis. **(C,D)** U2OS cells were transfected with a control plasmid (pcDNA3) or a PA28 $\gamma$ -expressing plasmid (pcDNA3-PA28 $\gamma$ ). After 48-hr incubation, cells were fixed and immunostained for coilin. Cajal bodies (CBs) were observed in the form of nuclear dots (C). The indicated mRNA levels were determined by qRT-PCR analysis (D). **(E)** U2OS cells were transfected with the indicated siRNAs. After 48-hr incubation, cells were stained by propidium iodide (PI) and cell cycle properties of the cells were analyzed by flow cytometry. **(F)** U2OS cells were transfected with the indicated siRNAs, followed by synchronization of the cell cycle by a double-thymidine block. H2AX mRNA levels were determined by qRT-PCR analysis. **(G)** U2OS cells were transfected with the indicated siRNAs. After 48-hr incubation, the indicated protein levels were determined by western blotting analysis. Data are the means  $\pm$  S.D. (n=3-4). \*\* $P$ <0.001.

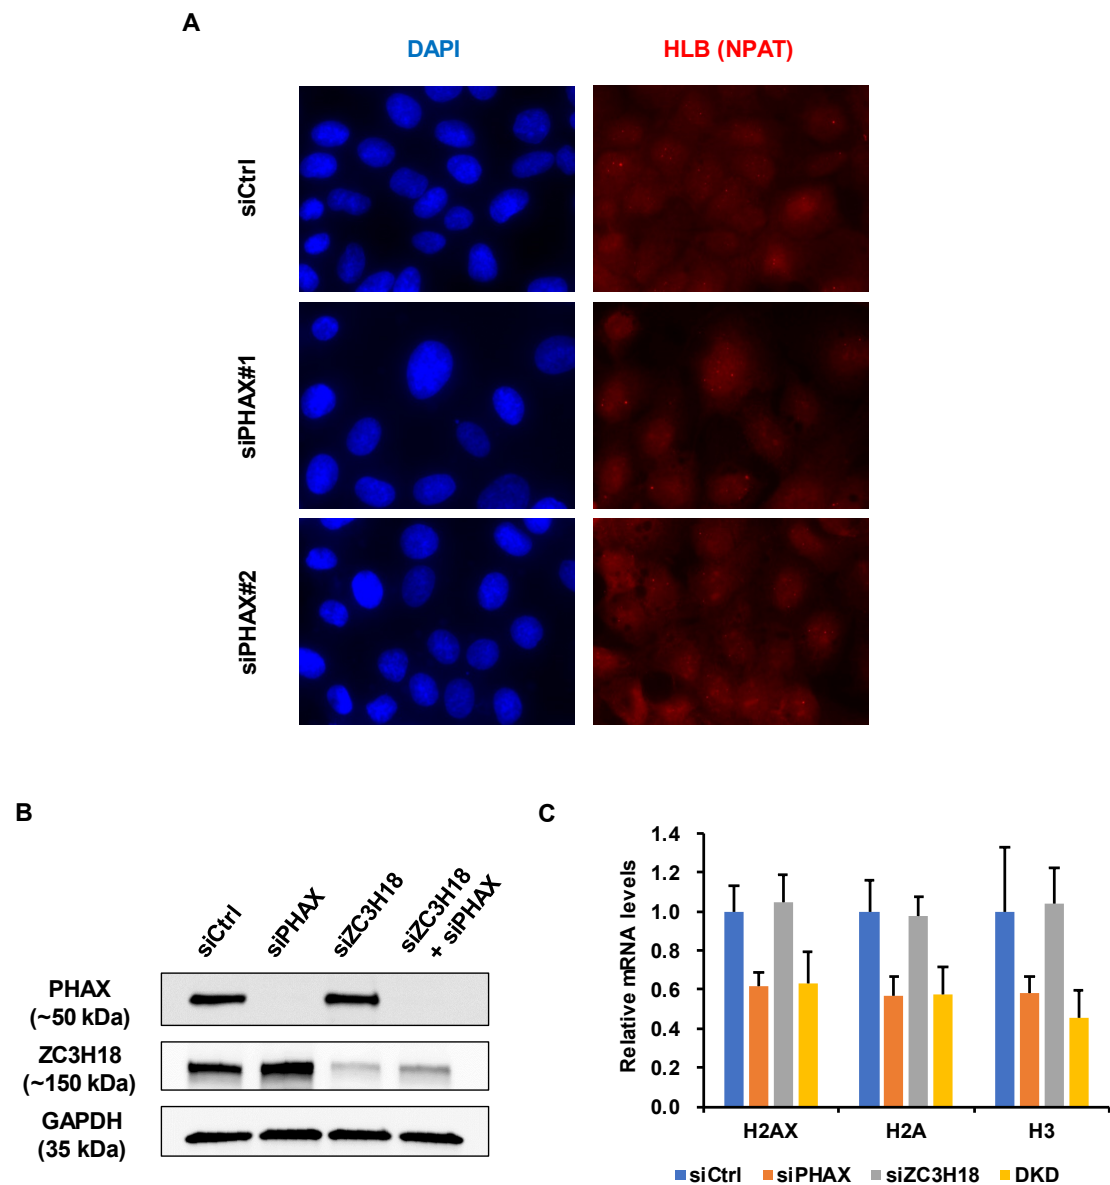

**Fig. S3. Suppression of histone mRNA transcription by knockdown of PHAX (related to Fig. 4).**

(A) U2OS cells were transfected with the indicated siRNAs. After 48-hr incubation, cells were fixed and immunostained for NPAT. Histone locus bodies (HLBs) were observed in the form of nuclear dots. (B,C) U2OS cells were transfected with the indicated siRNAs. After 48-hr incubation, the indicated protein (B) and mRNA (C) levels were determined by western blotting analysis and qRT-PCR analysis, respectively. Data are the means  $\pm$  S.D. (n=4).

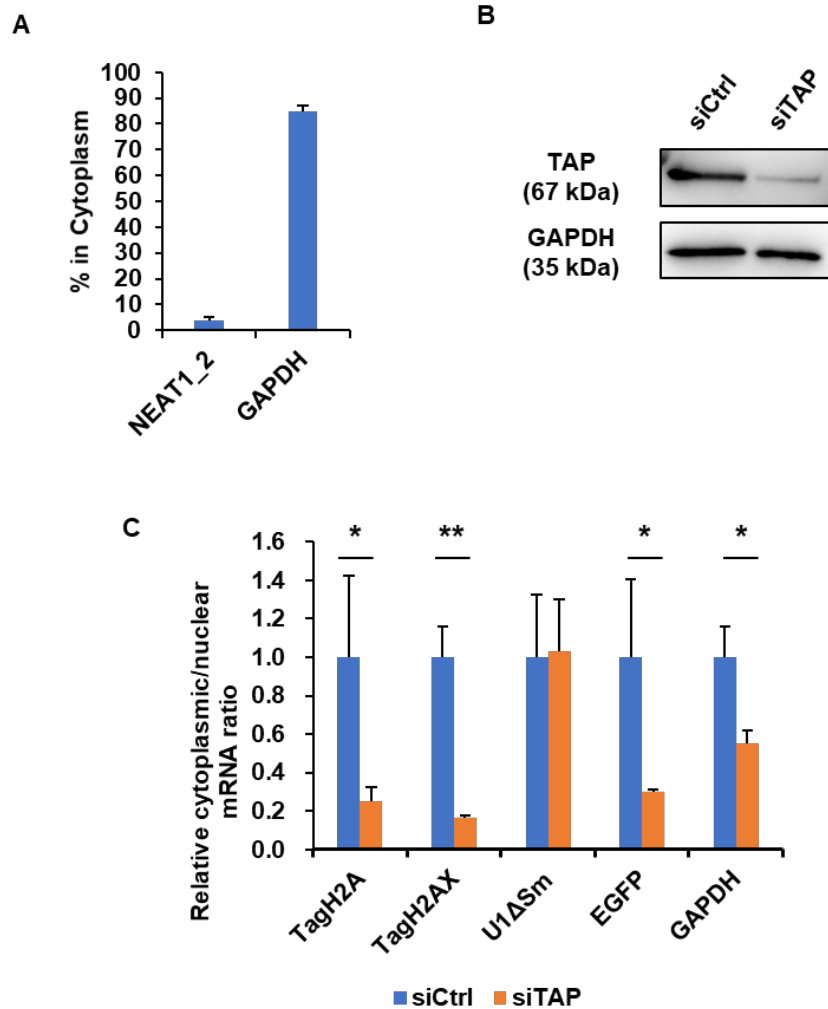

**Fig. S4. Reduction in histone mRNA export efficiencies by knockdown of PHAX (related to Fig. 5).**

(A) RNA was extracted from the nuclear and cytoplasmic fractions of U2OS cells, and the indicated mRNA levels were determined by qRT-PCR analysis. (B) U2OS cells were transfected with siTAP. After 48-hr incubation, the indicated levels were similarly determined. (C) U2OS cells were transfected with siTAP, followed by transfection with plasmids expressing the indicated genes. After 3-hr incubation, the indicated mRNA levels in nucleus and cytoplasm of the cells were similarly determined. Data are the means  $\pm$  S.D. (n=3). \* $P$ <0.05, \*\* $P$ <0.01.

**Suppl. Table S1****The antibodies used in this study**

| No. | antigen          | type   | Company                                      |
|-----|------------------|--------|----------------------------------------------|
| 1   | p53              | mouse  | Santa Cruz Biotechnology, Santa Cruz, CA     |
| 2   | p53 (S392)       | rabbit | Abcam, Cambridge, UK                         |
| 3   | $\alpha$ -tublin | rabbit | Abcam, Cambridge, UK                         |
| 4   | p-ATM            | mouse  | Rockland Inc, Limerick, PA                   |
| 5   | p-DNA-PKcs       | rabbit | Abcam, Cambridge, UK                         |
| 6   | H2AX             | rabbit | Cell Signaling Technology, Danvers, MA       |
| 7   | gH2AX            | rabbit | Cell Signaling Technology, Danvers, MA       |
| 8   | H2A              | rabbit | Cell Signaling Technology, Danvers, MA       |
| 9   | H3               | rabbit | Abcam, Cambridge, UK                         |
| 10  | GAPDH            | rabbit | Abcam, Cambridge, UK                         |
| 11  | RNAPII-CTD       | mouse  | Abcam, Cambridge, UK                         |
| 12  | Coilin           | mouse  | Abcam, Cambridge, UK                         |
| 13  | ZC3H18           | rabbit | Sigma-aldrich, St Louis, MO                  |
| 14  | PHAX             | rabbit | Abcam, Cambridge, UK                         |
| 15  | PHAX             | mouse  | previously described (Ohno et al. 2000)      |
| 16  | TAP              | rabbit | previously described (McCloskey et al. 2012) |

**Suppl. Table S2****The primers and probes used in this study**

| No | name       | purpose | sequence                             |
|----|------------|---------|--------------------------------------|
| 1  | H1-F       | qRT-PCR | CCGGCTATGATGTGGAGAAA                 |
| 2  | H1-R       |         | GTGCCTTTCGTTTGCACCAG                 |
| 3  | H2A-F      |         | GGCTCGGGACAACAAGAAGAC                |
| 4  | H2A-R      |         | CTGGGCGATGGTGACTTTG                  |
| 5  | H3-F       |         | CTGCCTTTCAGCGTCTGGT                  |
| 6  | H3-R       |         | GCACAGGTTGGTGTCTCAA                  |
| 7  | H2AX-F     |         | AGTGTACCTGGCGGCAGTGCT                |
| 8  | H2AX-R     |         | GGATGATTTCGCGTCTTCTTGTG              |
| 9  | GAPDH-F    |         | ATGAGAAGTATGACAACAGCCTCAA            |
| 10 | GAPDH-R    |         | AGTCCTTCCACGATACCAAAGTT              |
| 11 | b-actin-F  |         | ACGAGGCCCAAGAGCAAGAGAGG              |
| 12 | b-actin-R  |         | TCTCCATGTCGTCCAGTTGGT                |
| 13 | c-myc-F    |         | GGCTCCTGGCAAAAGGTCA                  |
| 14 | c-myc-R    |         | CTGCGTAGTTGTGCTGATGT                 |
| 15 | hnRNPH1-F  |         | ATTCAAAATGGGGCTCAAGGTAT              |
| 16 | hnRNPH1-R  |         | GTGTCAGGACTATTGGACCAG                |
| 17 | JTV1-F     |         | GTTGAAAGCTGCAGTTGATGGCCT             |
| 18 | JTV1-R     |         | GCACTGAATTCAAGTCCAGCGCAT             |
| 19 | PEX1-F     |         | AAAGCTGAGCTCTTGGGAGGAGT              |
| 20 | PEX1-R     |         | AGAGACATCAGCTGCCGAGACAAA             |
| 21 | NEAT1-F    |         | CAATTACTGTCGTTGGGATTTAGAGTG          |
| 22 | NEAT1-R    |         | TTCTTACCATACAGAGCAACATACCAG          |
| 23 | U1snRNA-F  |         | ACTTACCTGGCAGGGGAGATAC               |
| 24 | U1snRNA-R  |         | ACATCCGGAGTGCAATGGATAA               |
| 25 | U2snRNA-F  |         | ATCGCTTCTCGGCCTTTTG                  |
| 26 | U2snRNA-R  |         | CCATTTAATATATTGTCCTCGG               |
| 27 | U6snRNA-F  |         | CTCGCTTCGGCAGCACATATAC               |
| 28 | U6snRNA-R  |         | ACGCTTCACGAATTTGCGTGTC               |
| 29 | U7snRNA-F  |         | GCATAAGCTTAGTGTACAGCTCTTTAGAAATTTGTC |
| 30 | U7snRNA-R  |         | CGTAGAATTCAGGGGCTTCCGGTAAAAAGCCAG    |
| 31 | 7SKsnRNA-F |         | GGTCTTCGGTCAAGGGTATAC                |
| 32 | 7SKsnRNA-R |         | GTGTCTGGAGTCTTGAAGC                  |

|    |              |      |                            |
|----|--------------|------|----------------------------|
| 33 | Fluc-F       |      | CGCAGCTTGCAAGACTATAAGATTCA |
| 34 | Fluc-R       |      | AAGTTGCTTAGGTCGTAAGTTCGATG |
| 35 | Rluc-F       |      | CAAGGAGAAGGGCGAGGTTA       |
| 36 | Rluc-R       |      | TGTAGTTGCGGACAATCTGGA      |
| 37 | tag-F        |      | CAGAATTCTGATCGCGCTTCTCGTTG |
| 38 | tagH2A-R     |      | GAGACTTAGACTTGCGCGCT       |
| 39 | tagH2AX-R    |      | CACTGGGAAGTGGAGGCC         |
| 40 | H2AA-349-F   | ChIP | TTGGTGACGGCTTCTTGG         |
| 41 | H2AA-349-R   |      | TACCGCTCTGCTTGCCTTCT       |
| 42 | H2AA-73-F    |      | GCTTGAGCCAATCAAAGTGCTC     |
| 43 | H2AA-73-R    |      | CAGCGATAGTAGTCACCGAGAGAAA  |
| 44 | H2AA+263-F   |      | GGCTCGGGACAACAAGAAGAC      |
| 45 | H2AA+263-R   |      | CTGGGCGATGGTGACTTTG        |
| 46 | H2AA+749-F   |      | CCACACAGTCACAAACACCAG      |
| 47 | H2AA+749-R   |      | CATAGCCTGCGGAAACCACT       |
| 48 | H2AX-322-F   |      | TCTAGGTGGCCTCAGACTCC       |
| 49 | H2AX-322-R   |      | ACGCAGACTGCCAACTATCC       |
| 50 | H2AX-89-F    |      | GGAGGCGGGTATTGGAGAAA       |
| 51 | H2AX-89-R    |      | AACACTAGAACAGACGCCCG       |
| 52 | H2AX+220-F   |      | AGTGTACCTGGCGGCAGTGCT      |
| 53 | H2AX+220-R   |      | GGATGATTGCGCTTCTTGTG       |
| 54 | H2AX+1166-F  |      | CAGGCCTTTCACATCAGCTCTC     |
| 55 | H2AX+1166-R  |      | GGAGGAAGATGTGCCTGTTACCAA   |
| 56 | GAPDH-466-F  |      | CACCCTGCCCTCAATATCCC       |
| 57 | GAPDH-466-R  |      | TTCATTCCATCCAGCCTGGG       |
| 58 | GAPDH+73-F   |      | GAGCAGTCCGGTGACTACTAC      |
| 59 | GAPDH+73-R   |      | GCCCCCTCCCCTTCTTTC         |
| 60 | GAPDH+1662-F |      | ATTCCACCGCAAATGGCC         |
| 61 | GAPDH+1662-R |      | CCCGGTGACATTACAGCCT        |
| 62 | GAPDH+3485-F |      | GACTGAGGCTCCCACCTTTC       |
| 63 | GAPDH+3485-R |      | ACATCACCCCTCTACCTCCC       |

|    |              |                            |                                              |
|----|--------------|----------------------------|----------------------------------------------|
| 64 | U1 probe     | Northern blotting analysis | TTATGCAGTCGAGTTTCCCACATTT                    |
| 65 | U7 probe     |                            | TTCTAAAAGAGCTGTAACAC                         |
| 66 | 5.8S probe   |                            | TCGAAGTGTGCGATGATCAATGTGTC                   |
| 67 | H1Cp-F       | pGL4-H1Cp                  | TACTCGAGCCTTGCCAGTCCACAGTT                   |
| 68 | H1Cp-R       |                            | GGAAGCTTGAGCAGTCTCGGACATGTTG                 |
| 69 | H2AXp-F      | pGL4-H2AXp                 | TACTCGAGATCCTGTTTCCTGGCATGGG                 |
| 70 | H2AXp-R      |                            | GGAAGCTTCGCAGTGTAACTGCTGTGCG                 |
| 71 | GAPDHp-F     | pGL4-GAPDHp                | TACTCGAGAGTTCCCAACTTCCCGC                    |
| 72 | GAPDHp-R     |                            | GGAAGCTTAGAAGATGCGGCTGACTGTC                 |
| 73 | H2Ap-H2A-F   | pUC118-H2Ap-H2A            | CTCGCTCGCTATACGCTCAA                         |
| 74 | H2Ap-H2A-R   |                            | TTGTCGACCCAGCTAGTTTCTGTGGGG                  |
| 75 | H2AXp-H2AX-F | pUC118-H2AXp-H2AX          | TATCTAGAATCCTGTTTCCTGGCATGGG                 |
| 76 | H2AXp-H2AX-R |                            | TTAAGCTTCTGAAGGTGTTGTGTGTGCG                 |
| 77 | tagH2Amut-F  | pUC118-H2Ap-tagH2A         | AGATGATCGCGCTTCTCGTTGGGGCGTGTGCTGCAATTTGATGC |
| 78 | tagH2Amut-R  |                            | AGAACCACATTTCTAGGGCTGC                       |
| 79 | tagH2AXmut-F | pUC118-H2AXp-tagH2AX       | ATGATCGCGCTTCTCGTTGGGGTGTGTTGAGCCGTCGTGCTTC  |
| 80 | tagH2AXmut-R |                            | CTAGAACAGACGCCCCGCC                          |

## References

- Machitani M, Sakurai F, Wakabayashi K, Takayama K, Tachibana M, Mizuguchi H. 2017. Type I Interferons Impede Short Hairpin RNA-Mediated RNAi via Inhibition of Dicer-Mediated Processing to Small Interfering RNA. *Mol Ther-Nucl Acids* **6**: 173-182.
- McCloskey A, Taniguchi I, Shinmyozu K, Ohno M. 2012. hnRNP C tetramer measures RNA length to classify RNA polymerase II transcripts for export. *Science* **335**: 1643-1646.
- Ohno M, Segref A, Bachi A, Wilm M, Mattaj JW. 2000. PHAX, a mediator of U snRNA nuclear export whose activity is regulated by phosphorylation. *Cell* **101**: 187-198.
